# Supplementary material for: Phenotypically Selective Genotyping Realizes More Genetic Gains in a Rainbow Trout Breeding Program in the Presence of Genotype-by-Environment Interactions
Source: PubMed Central journal article supplement (PMC7517704; doi:10.3389/fgene.2020.00866), 2020-09-11
Supplement: Data_Sheet.pdf [file Data_Sheet.pdf]

625 **Appendix**

626 **Appendix 1: Sex ratio genotyping**

627 At a constant number of fish genotyped in the breeding environment (B), the use of a certain sex ratio  
 628 can optimize the intensity of selection and thus genetic gain. The sex ratio was derived  
 629 deterministically for the schemes that used random genotyping and selective genotyping.

630 *Selective genotyping*

631 In schemes that used selective genotyping of top fish in B, parents were selected in two steps:  
 632 phenotypic selection and then genomic selection. In other words, all parents and candidates for  
 633 genomic selection had already undergone phenotypic selection. It was assumed that the intensity of  
 634 phenotypic selection for males to be genotyped was the same as for females.

635 The accuracy of genomic breeding values (GEBV) was unaffected regardless of the sex ratio  
 636 genotyped because the total number of genotyped fish for both sexes was constant. However, the  
 637 genotyping of different sex ratios can affect the rate of genetic gain: that is,  $\Delta G$  is proportional to  
 638  $(\bar{i}_s + \bar{i}_d)$ , where  $\bar{i}_s$  is the intensity of genomic selection of sires from genotyped male candidates and  
 639  $\bar{i}_d$  is the intensity of genomic selection of selected females from genotyped females. The intensity of

640 selection of 50 sires for mating  $\bar{i}_s$  was  $\bar{i}_s = f\left(\frac{50}{n_M}\right)$ , where  $f()$  is the function for calculating the  
 641 intensity of selection from the proportion of selected fish and  $n_M$  is the number of males in B  
 642 genotyped per year and is an integer value greater than 50.

643 Note that  $\bar{i}_d$  is the intensity of selection of the 400 females because the selection of 50 dams for  
 644 mating from among the 400 selected females was random. The 400 females were selected from  
 645 among 3-year-old female offspring in the current year and from among 4-year-old females that had  
 646 been used as potential dams in the previous year. Two steps were involved in the selection of 4-year-  
 647 old females. However, in its simplest terms, the intensity of selection of the 400 selected females  $\bar{i}_d$

648 was approximated as  $\bar{i}_d \approx \frac{D_3}{400} f\left(\frac{D_3}{n_F}\right) + \frac{(D_4)}{400} f\left(\frac{D_4}{D_3}\right)$ , where  $n_F$  is the number of females in B  
 649 genotyped per year and is an integer value greater than  $D_3$  or equal to 0,  $D_3$  is the number of 3-year-  
 650 old females selected from among the genotyped females, and  $D_4 = 400 - D_3$  is the number of 4-year-  
 651 old selected females selected from among the 3-year-old selected females in the previous year. The  
 652 sum of  $n_M$  and  $n_F$  was 1000, 800, 600, and 400 when the breeding scheme allocated 0%, 20%, 40%,  
 653 and 60%, respectively, of genotyping to fish in the commercial environment (C). When the  
 654 proportion of selected females kept in two consecutive years was 11% and 100%,  $D_3$  was 360 and

655 200, respectively, and  $D_4$  was 40 and 0, respectively. When  $D_4$  was 0,  $\bar{i}_d = \frac{D_3}{400} f\left(\frac{D_3}{F}\right)$ .

656 To optimize the genetic gains of schemes that used selective genotyping, the sex ratio of genotyped  
 657 individuals had to lead to the maximum of  $(\bar{i}_s + \bar{i}_d)$ :

658 
$$\max(\bar{i}_s + \bar{i}_d) = f\left(\frac{50}{n_M}\right) + \frac{D_3}{400} f\left(\frac{D_3}{n_F}\right) + \frac{(D_4)}{400} f\left(\frac{D_4}{D_3}\right). \quad (A1)$$

## Genotyping in breeding program with G×E

659 Because  $D_3$ ,  $D_4$ , and the sum of  $n_M$  and  $n_F$  were known, we could identify  $n_M$  and  $n_F$  by varying the  
 660 values. However, in practice,  $n_M$  and  $n_F$  cannot be implemented precisely. Thus, values of  $n_M$  and  $n_F$   
 661 that were multiples of 50 were used to find the values with  $\Delta G$  optimized.

662 These procedures were used to determine  $n_M$  and  $n_F$  for the scenarios that used selective genotyping  
 663 of top individuals. For the scenarios that used selective genotyping of top and bottom individuals, the  
 664 procedures were similar except that the sum of  $n_M$  and  $n_F$  was equal to the number of top individuals  
 665 genotyped. In a preliminary analysis, when the sum of  $n_M$  and  $n_F$  was assumed to be equal to the  
 666 number of top and bottom individuals, genetic gains were lower, and the selection of bottom fish as  
 667 parents was very rare.

### 668 *Random genotyping*

669 In schemes that used random genotyping of fish in B, the selection of parents could be based on  
 670 either genomic selection for both males and females or the use of genomic selection for males and  
 671 phenotypic selection for females. Genotyped individuals that were randomly selected from offspring  
 672 were candidates for genomic selection. If no females were genotyped, potential dams were selected  
 673 based on phenotypic selection. Therefore, genetic gains of the schemes could be from genomic  
 674 selection or phenotypic selection. The genotyping of different sex ratios can affect the rate of genetic  
 675 gain; that is,  $\Delta G$  is proportional to  $\left\{ \rho_{gC} \frac{(i_{s1} + i_{d1})}{2} + \sqrt{h^2 r_g} \frac{(i_{s2} + i_{d2})}{2} \right\}$ , where  $\rho_{gC}$  is the accuracy of  
 676 GEBV of the trait measured in C;  $h^2$  is the heritability of the trait;  $i_{s1}$  and  $i_{d1}$  are the intensity of  
 677 selection of sires and selected females based on GEBV, respectively; and  $i_{s2}$  and  $i_{d2}$  are the intensity  
 678 of selection of sires and selected females based on phenotypic selection, respectively. We obtained  
 679 the accuracy of GEBV by simulating the preliminary schemes that used random genotyping. The sex  
 680 ratio of genotyped individuals of these preliminary schemes was same as the ratio used in the  
 681 corresponding schemes that used selective genotyping.

682 It was assumed that

683 - When  $n_M \leq 50$ ,  $i_{s1} = 0$  and  $i_{s2} = f\left(\frac{1}{20}\right)$

684 - When  $n_M > 50$ ,  $i_{s2} = 0$  and  $i_{s1} = f\left(\frac{50}{n_M}\right)$

685 - When  $n_F \leq D_3$ ,  $i_{d1} = 0$  and  $i_{d2} = f\left(\frac{1}{20}\right)$

686 - When  $n_F > D_3$ ,  $i_{d2} = 0$  and  $i_{d1} = \frac{D_3}{400} f\left(\frac{D_3}{n_F}\right) + \frac{(D_4)}{400} f\left(\frac{D_4}{D_3}\right)$ ,

687 where  $n_M$  and  $n_F$  are the number of males and females in B genotyped per year, respectively;  $D_3$  is  
 688 the number of 3-year-old selected females selected from among the genotyped females; and  
 689  $D_4 = 400 - D_3$  is the number of 4-year-old selected females selected from among the 3-year-old  
 690 selected females in the previous year.

691 We varied  $n_M$  and  $n_F$  to find the values with  $\Delta G$  optimized. Sires were genotyped in all scenarios,  
 692 but females in B were not genotyped in some scenarios.

## Genotyping in breeding program with G×E

693 **Appendix 2:** Sex ratios genotyped for scenarios that used different genotyping of fish in B,  
 694 proportions of genotyping allocated to fish in C ( $P_C\%$ ), proportions of selected females kept in two  
 695 consecutive years ( $P_F\%$ ), genetic correlations ( $r_g$ ) between the trait measured in B and C, heritability  
 696  $h^2$  of the trait ( $h^2$ )

697

| Genotyping strategy | $P_C\%$ | $P_F\%$ | $h^2$    | $r_g$         | Sex ratio genotyped (males:females) |
|---------------------|---------|---------|----------|---------------|-------------------------------------|
| Random              | 20      | 100     | 0.1      | 0.2           | 350:450                             |
| Random              | 20      | 100     | 0.1      | 0.5           | 350:450                             |
| Random              | 20      | 100     | 0.1      | 0.8           | 800:0                               |
| Random              | 20      | 100     | 0.3      | 0.2           | 350:450                             |
| Random              | 20      | 100     | 0.3      | 0.5           | 800:0                               |
| Random              | 20      | 100     | 0.3      | 0.8           | 800:0                               |
| Top1_1              | 0       | 11      | 0.3      | 0.2; 0.5; 0.8 | 400:600                             |
| Top1_1              | 0       | 100     | 0.3      | 0.2; 0.5; 0.8 | 400:600                             |
| Top1_1              | 20      | 11      | 0.3      | 0.2; 0.5; 0.8 | 300:500                             |
| Top1_1              | 20      | 100     | 0.3      | 0.2; 0.5; 0.8 | 350:450                             |
| Top1_1              | 40      | 11      | 0.3      | 0.2; 0.5; 0.8 | 600:0                               |
| Top1_1              | 40      | 100     | 0.3      | 0.2; 0.5; 0.8 | 250:350                             |
| Top1_1              | 60      | 11      | 0.3      | 0.2; 0.5; 0.8 | 400:0                               |
| Top1_1              | 60      | 100     | 0.3      | 0.2; 0.5; 0.8 | 400:0                               |
| T3_4B1_4            | 20      | 100     | 0.1; 0.3 | 0.2; 0.5; 0.8 | 250:350                             |
| T1_2B1_2            | 20      | 100     | 0.1; 0.3 | 0.2; 0.5; 0.8 | 800:0                               |

698 Note: Genotyping of fish in B: random genotyping (Random); selection of the phenotypically best fish from each sample  
 699 of 20 fish (Top1\_1); selection of fish from three of the four top fish and one of the four bottom fish, ~~while~~ where the top  
 700 and bottom fish were the best and worst fish, respectively, from each sample of 20 fish (T3\_4B1\_4); selection of fish  
 701 from one of the two top fish and one of the two bottom fish, where ~~while~~ the top and bottom fish were the best and worst  
 702 fish, respectively, from each sample of 20 fish (T1\_2B1\_2). B, breeding environment; C, commercial environment.  
 703

704 Appendix 2 shows the sex ratios genotyped for all scenarios in our study. In some scenarios, no  
 705 female offspring were genotyped; rather, females were selected based on phenotype in B. This was  
 706 based on the assumptions that trout had have reproductive capacity and that phenotypic selection is a  
 707 relatively inexpensive approach to improving the breeding program for the fish. In our study, family  
 708 size was limited to 200, giving 20,000 offspring per year. This constant number of offspring was  
 709 used for genotype testing of fish in B and C in all scenarios. In the scenarios in which no females  
 710 were genotyped and 100% of selected females were kept in two consecutive years, each family  
 711 produced an extra 40 offspring, giving 4000 female offspring for the phenotypic selection of 200  
 712 females as potential parents. In the scenarios in which no females were genotyped and 11% of  
 713 selected females were kept in two consecutive years, each family produced an extra 70 offspring,  
 714 giving 7000 female offspring for the phenotypic selection of 350 females as potential parents.

715

## Genotyping in breeding program with G×E

### 716 Appendix 3: Expected accuracy and bias of GEBV

717 In the scenarios with records measured in C, the accuracy of GEBV was calculated as the correlation  
 718 between GEBV of the C trait and TBV of the C trait:

$$719 \quad cor(GEBV_C, TBV_C) = \frac{cov(GEBV_C, TBV_C)}{\sqrt{var(GEBV_C)var(TBV_C)}} \quad (A3.1)$$

720 where  $cor(GEBV_C, TBV_C)$  is the accuracy of GEBV in the scenarios with records measured in C;  
 721  $cov(GEBV_C, TBV_C)$  is the covariance between GEBV of the C trait and TBV of the C trait; and  
 722  $var(GEBV_C)$  and  $var(TBV_C)$  are the variances of GEBV of the C trait and TBV of the C trait,  
 723 respectively. In these scenarios, bias of GEBV ( $b_{GEBV_C, TBV_C}$ ) was calculated as the regression slope of  
 724 TBV of the C trait on GEBV of the C trait and was equal to:

$$725 \quad b_{GEBV_C, TBV_C} = \frac{cov(GEBV_C, TBV_C)}{var(GEBV_C)} \quad (A3.2)$$

726 In our derivations of the expected accuracy of GEBV and expected bias of GEBV, we assumed that  
 727 the GEBV of a trait is expected to be the same as the TBV of that trait. Therefore, in the scenarios  
 728 with records measured in C, the expected accuracy of GEBV in (A3.1) was 1, and the expected bias  
 729 of GEBV in (A3.2) was 1.

730 In the scenarios without records measured in C, the accuracy of GEBV was calculated as the  
 731 correlation between GEBV of the B trait and TBV of the C trait:

$$732 \quad cor(GEBV_B, TBV_C) = \frac{cov(GEBV_B, TBV_C)}{\sqrt{var(GEBV_B)var(TBV_C)}} \quad (A3.3)$$

733 where  $cor(GEBV_B, TBV_C)$  is the accuracy of GEBV in the scenarios without records measured in C;  
 734  $cov(GEBV_B, TBV_C)$  is the covariance between GEBV of the B trait and TBV of the C trait; and  
 735  $var(GEBV_B)$  is the variance of GEBV of the C trait. In these scenarios, bias of GEBV ( $b_{GEBV_C, TBV_C}$ )  
 736 was calculated as the regression slope of TBV of the C trait on GEBV of the C trait and was equal to:

$$737 \quad b_{GEBV_B, TBV_C} = \frac{cov(GEBV_B, TBV_C)}{var(GEBV_B)} \quad (A3.4)$$

738 Equation (A3.4) can be reformulated:

$$739 \quad b_{GEBV_B, TBV_C} = \frac{cov(GEBV_B, TBV_C)}{\sqrt{var(GEBV_B)var(TBV_C)}} \times \sqrt{\frac{var(TBV_C)}{var(GEBV_B)}} \quad (A3.5)$$

740 In the scenarios without records measured in C, the expected accuracy of GEBV in (A3.3) was equal  
 741 to  $cor(TBV_B, TBV_C)$  that is  $r_g$ . The expected bias of GEBV in (A3.4) and (A3.5) was  $r_g \times$

742  $\sqrt{\frac{var(TBV_C)}{var(TBV_B)}}$ . As  $var(TBV_C)$  and  $var(TBV_B)$  were identical, and equal to 1, the expected bias of  
 743 GEBV was  $r_g$  in the scenarios without records measured in C.

744

## Genotyping in breeding program with G×E

745 **Appendix 34:** Variance components estimated from pedigree-based bivariate model for different  
 746 genotyping scenarios for fish in B and C

| Parameter       | Simulated value | B-Random<br>C-Random | B-Top1_1<br>C-Random | B-T1_2B1_2<br>C-Random | B-Top1_1<br>C-T1_1B1_1 | B-Top1_1<br>C-Top1_1 |
|-----------------|-----------------|----------------------|----------------------|------------------------|------------------------|----------------------|
| $\sigma_{gB}^2$ | 1               | 0.955                | 0.223                | 9.755                  | 0.216                  | 0.227                |
| $\sigma_{gC}^2$ | 1               | 0.957                | 0.91                 | 0.908                  | 8.488                  | 0.221                |
| $r_g$           | 0.5             | 0.453                | 0.198                | 1.323                  | 0.446                  | 0.121                |
| $\sigma_{eB}^2$ | 2.333           | 2.36                 | 1.04                 | 3.557                  | 1.04                   | 1.039                |
| $\sigma_{eC}^2$ | 2.333           | 2.381                | 2.416                | 2.369                  | 2.865                  | 1.042                |
| $h_B^2$         | 0.3             | 0.288                | 0.176                | 0.733                  | 0.172                  | 0.179                |
| $h_C^2$         | 0.3             | 0.286                | 0.273                | 0.276                  | 0.747                  | 0.173                |

747 Note: Pedigrees were registered for genotyped fish only. Genotyping strategies: random genotyping (Random), selection  
 748 of fish from one of the two top fish and one of the two bottom fish while the top and bottom fish were the best and worst  
 749 fish, respectively, from each sample of 20 fish (T1\_2B1\_2), selection of the phenotypically best fish from each sample of  
 750 20 fish (Top1\_1), and selection of the phenotypically best and worst fish from each sample of 20 fish (T1\_1B1\_1). The  
 751 direct genetic variance, residual variance, and heritability are  $\sigma_{gB}^2$ ,  $\sigma_{eB}^2$ , and  $h_B^2$ , respectively, for the trait measured in B  
 752 and  $\sigma_{gC}^2$ ,  $\sigma_{eC}^2$ , and  $h_C^2$ , respectively, for the trait measured in C. The scenarios were simulated with  $r_g$  of 0.5, heritability  
 753 of 0.3, 20% of genotyping allocated to fish in C, and 100% of selected females kept in two consecutive years. B, breeding  
 754 environment; C, commercial environment.

755
